# Supplementary material for: Parochial Linguistic Education: Patterns of an Enduring Friction within a Divided Catalonia
Source: MDPI journal article supplement (doi:10.3390/genealogy5030077), 2021-08-30
Supplement: s1 [file s1]

Archive with 1 entries (1 files):
- genealogy-1285139-supplementary.pdf
